# Supplementary material for: Possible High-Temperature Superconductivity inLi2CuH6 at Ambient Pressure
Source: Research Square preprint supplement (doi:10.21203/rs.3.rs-8693805/v1), 2026-02-11
Supplement: Supplementary file 1 [file 9ae1564addb7e89e5da07c73.pdf]

# Supporting Information:

## Possible High-Temperature Superconductivity in $\text{Li}_2\text{CuH}_6$ at Ambient Pressure

Prutthipong Tsuppayakorn-aek,<sup>†</sup> Sirinee Thasitha,<sup>‡</sup> Anan Udomkijmongkol,<sup>‡</sup>  
Wiwittawin Sukmas,<sup>¶</sup> Tanveer Hussain,<sup>§</sup> Thiti Bovornratanaraks,<sup>¶</sup> and Komsilp  
Kotmool<sup>\*,‡,||</sup>

<sup>†</sup>*Division of Physics, Faculty of Science and Technology, Princess of Naradhiwas  
University, Narathiwat, 96000, Thailand*

<sup>‡</sup>*School of Integrated Innovative Technology, King Mongkut's Institute of Technology  
Ladkrabang, Bangkok, 10520, Thailand*

<sup>¶</sup>*Extreme Conditions Physics Research Laboratory and Center of Excellence in Physics of  
Energy Materials (CE:PEM), Department of Physics, Faculty of Science, Chulalongkorn  
University, Bangkok 10330, Thailand*

<sup>§</sup>*School of Science and Technology, University of New England, Armidale, New South  
Wales 2351, Australia*

<sup>||</sup>*School of Science, King Mongkut's Institute of Technology, Ladkrabang, Bangkok 10520,  
Thailand*

E-mail: komsilp.ko@kmitl.ac.th

Figure S1: Ternary convex hulls of Li–Cu–H as a function of pressure

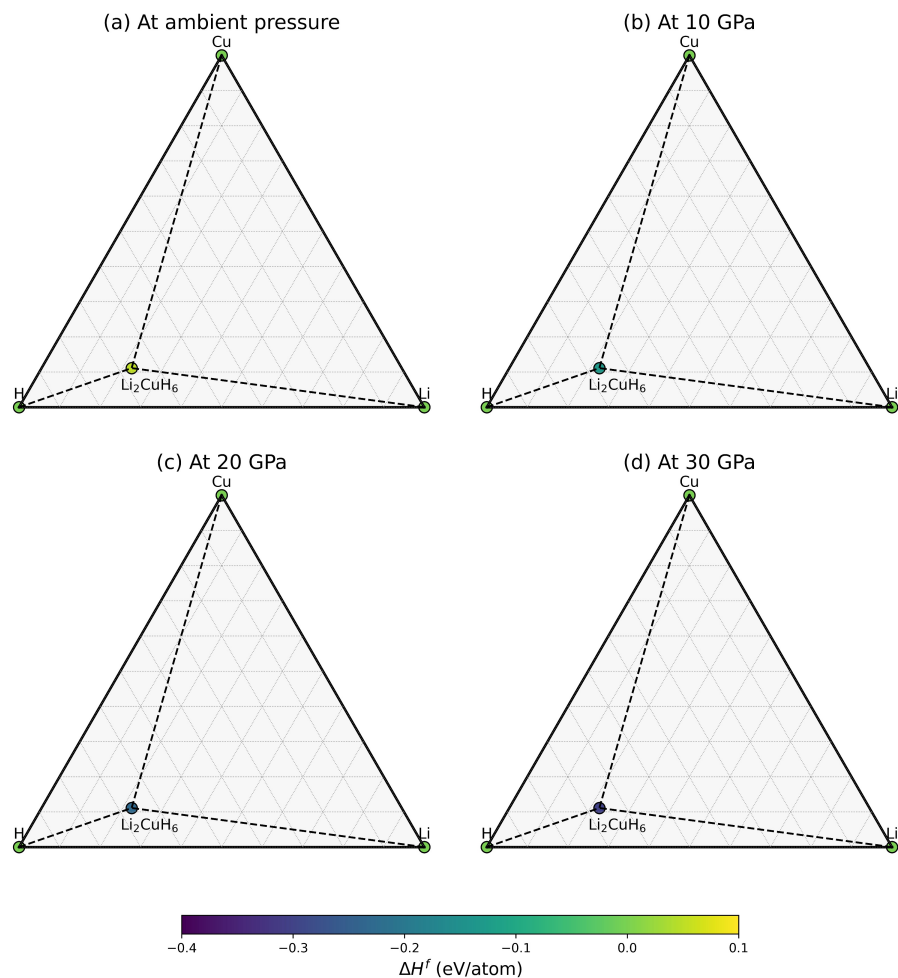

Figure S1: Ternary convex hulls of the Li-Cu-H system at pressures of (a) ambient pressure, (b) 10 GPa, (c) 20 GPa, and (d) 30 GPa, respectively.

**Figure S2: Phonon density of state and Debye model for  $\text{Li}_2\text{CuH}_6$  at ambient pressure**

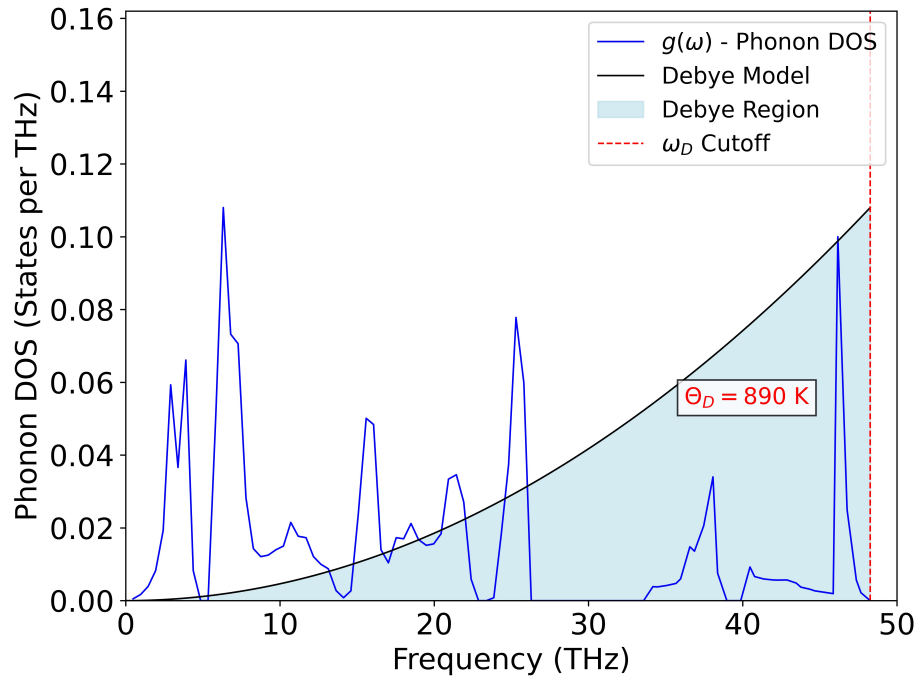

Figure S2: Phonon density of state and Debye model for  $\text{Li}_2\text{CuH}_6$  at ambient pressure.
